# Supplementary material for: Safety of ranibizumab in routine clinical practice: 1-year retrospective pooled analysis of four European neovascular AMD registries within the LUMINOUS programme
Source: PubMed Central journal article supplement — Br J Ophthalmol. 2013 Jul 13;97(9):1161–7. doi: 10.1136/bjophthalmol-2013-303232 (PMC3756427; doi:10.1136/bjophthalmol-2013-303232), 2013-07-13
Supplement: bjophthalmol-2013-303232-s1.pdf [file bjophthalmol-2013-303232-s1.pdf]

**Supplementary Figure 1. The LUMINOUS program**

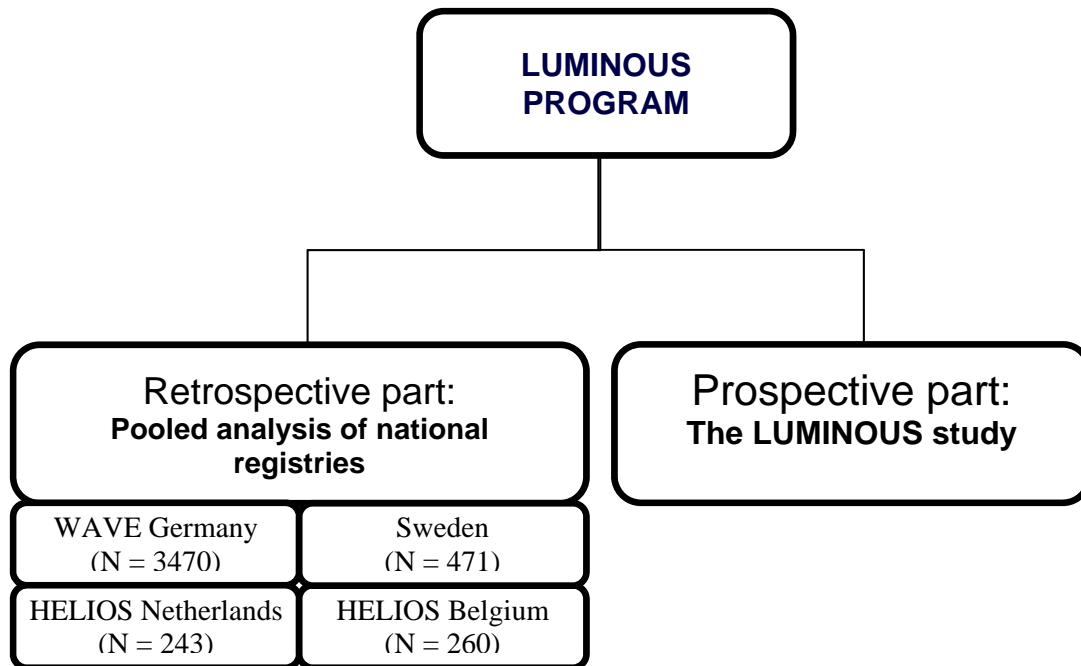

***All approved indications at time of study, according to local product label:***

- *NV-AMD*
- *NV-AMD*
- *Visual impairment due to DME*
- *Visual impairment due to macular edema secondary to RVO*

**Supplementary Table 1.** Site list from the four European registries

| Country | Investigator and study site                                                                                                                                                                                                                                                                                                                                                                                                                                                                                                                                                                                                                                                                                                                                                                                                                                                                                                                                                                                                                                                                                                                         |
|---------|-----------------------------------------------------------------------------------------------------------------------------------------------------------------------------------------------------------------------------------------------------------------------------------------------------------------------------------------------------------------------------------------------------------------------------------------------------------------------------------------------------------------------------------------------------------------------------------------------------------------------------------------------------------------------------------------------------------------------------------------------------------------------------------------------------------------------------------------------------------------------------------------------------------------------------------------------------------------------------------------------------------------------------------------------------------------------------------------------------------------------------------------------------|
| Belgium | <p>Dr Mergaerts. Medisch Centrum, Aarschot</p> <p>Prof Rasquin. Clin. Univ. Bruxelles Hopital Erasme, Anderlecht</p> <p>Dr Guagnini. Cliniques Universitaires St.-Luc, Woluwe-Saint-Lambert</p> <p>Dr Postelmans. C.H.U. Brugmann (Victor Horta), Laken</p> <p>Prof Leys. U.Z St Raphael, Leuven</p> <p>Dr Augustinus. A.Z. Middelheim, Antwerpen</p> <p>Dr Levecq. Clinique Universitaires U.C.L, Godinne</p> <p>Drs Rakic/ Blaise/ Locht. C.H.U. Sart-Tilman, Luik</p> <p>Dr Dirven. Sint Josef Turnhout, Turnhout</p> <p>Dr Rolland. St. Elisabeth, Namen</p> <p>Dr Mangelschots. Virga Jesse ziekenhuis, Hasselt</p> <p>Dr Neu. Sint Augustinus, Veurne</p> <p>Dr Lefevre. CHR Mouscron, Moeskroen</p> <p>Dr Vangermeersch. Imelda Ziekenhuis, Bonheide</p> <p>Dr Borlon. CHR Citadelle, Liège</p>                                                                                                                                                                                                                                                                                                                                              |
| Germany | <p>Hellmund, Kerstin Dr. Dresden</p> <p>Sachs, Helmut Priv.-Doz. Dr. Krankenhaus Dresden Friedrichstadt, Dresden</p> <p>Müller-Holz, Matthias Dr. Praxis Drs. Riedel und Müller-Holz, Dresden</p> <p>Sandner, Dirk OA Dr. Universitätsklinikum an der TU Dresden, Dresden</p> <p>Falke, Jürgen Dr. Augenzentrum Riesa, Riesa</p> <p>Dittmann, Matthias Dr. Augenzentrum Riesa, Riesa</p> <p>Goldberg, Alexander Dr. Coswig</p> <p>Paulig, Sylvia Dr. Augenkompetenzzentrum Cottbus, Cottbus</p> <p>Burghardt, Elke Dr. Überörtliche Gemeinschaftspraxis, Cottbus</p> <p>Radde, Anja Dr. Augenzentrum am Johannisplatz, Leipzig</p> <p>Petzold, Alexander Dr. Augenzentrum am Johannisplatz, Leipzig</p> <p>Knorrn, Martin Dr. Augenzentrum am Johannisplatz, Leipzig</p> <p>Hammer, Ute Dr. Praxis Drs. Hammer u. Habermann, Halle</p> <p>Grzibek, Cornelia Dr. Universitätsklinikum Halle (Saale), Halle</p> <p>Wiederhold, Christiane Dr. Praxis Drs. Heider und Wiederhold, Sangershausen</p> <p>Nagel, Edgar Dr. Rudolstadt</p> <p>Gerth, Katharina Dr. Praxis Dr. Jan Büttner, Gera</p> <p>Dawczynski, Jens Dr. Universitätsklinikum, Jena</p> |

Kohen, L. Dr. Helios Klinikum Aue, Aue  
Engelmann, Katrin Dr. Klinikum Chemnitz gGmbH, Chemnitz  
Müller, Bert Dr. Charité Universitätsmedizin Berlin, Berlin  
Schwarz, Norbert Dipl.-Med. Augentagesklinik Berlin, Berlin  
Velhagen, Ulrich Dr. Augentagesklinik, Berlin  
Tetz, Manfred Prof. Augentagesklinik Spreebogen, Berlin  
Pothhöfer, Simone Dr. Praxis Drs. Pöthhöfer & Behme, Berlin  
Karandish, Amir Dr. Berlin  
Zeisberg, Joachim Dr. Praxis Drs. Zeisberg, Berlin  
Kaulen, Peter Dr. Praxis Drs. Kaulen und Wiemer, Berlin  
Hartmann, Matthias Dr. Praxis Dres. Hartmann/Hesse, Berlin  
Keller, Irina Dr. Berlin  
Hermes, Kathrin Dr. Augenklinik Berlin-Marzahn GmbH, Berlin  
Fabricius, Eva-maria Dr. Berlin  
Thieme, Jochen Dr. Berlin  
Cordero Yannarella, Orlando Dr. Berlin  
Kriegerowski, Martin Dr. Praxis Drs. Kriegerowski u. Heine, Berlin  
Kreusel, Klaus-Martin Priv.-Doz. Dr. Berlin  
Gross, Mirjam Dr. Berlin  
Heuermann, Tim Dr. Operative Tagesklinik, Potsdam  
Kariger-Schweigert, Ute Dr. Praxis Drs. Kind u. Kariger-Schweigert,  
Falkensee  
Kilias, Stephan Dr. Praxis Dr. Kilias und Fetter, Neuenhagen  
Hanne, Olaf. Rüdersdorf  
Maruniak, Thomas. Augentagesklinik Schöneiche "Altes Kino", Schöneiche  
Gaul, Michaela Dr. Augenklinik Dr. med. Jürgen Schönewolf, Königs  
Wusterhausen  
Hennigs, Doreen. Praxis Fischer u. Hennigs, Schwedt  
Becker, Eckhard Dr. Oranienburg  
Höh, Helmut Prof. Dietrich-Bonhoeffer-Klinikum, Neubrandenburg  
Matschke, Lada. Neubrandenburg  
Rehfeldt, Karsta. Neubrandenburg  
Herfurth, Sabine Dr. Universitätsklinikum Greifswald, Greifswald  
Seidlein, Ingetraud PD Dr. Greifswald  
Schulz, Norbert Dr. Praxis Drs. Heine, Läufer, Schulz und Bohl, Rostock  
Berger, E. Dr. Universitätsklinikum Rostock, Rostock  
Fechner, Martin Dr. Stralsund  
Werschnik, C. Dr. Helios Kliniken Schwerin, Schwerin  
Bach, Andreas Dr. Schwerin  
Hajnis, Dagmar Dr. Hamburg

Lung, Karl-Heinz Dr. Hamburg  
Lauritzen, Kyra Dr. Buchholz i. d. N.  
Schweer, Michael Dr. Hanstedt  
Scharenberg, Gabriele Dr. Ärztehaus, Lüneburg  
Ellendorf, Klaus Dr. Praxis Drs. Scharenberg, Ellendorf und Walter, Lüneburg  
Heuer, Udo Dr. MEC Augenärzte, Hamburg  
Dave, Hita T. Dr. Asklepios Klinik Nord Heidberg, Hamburg  
Krüger, Renata Dr. Praxis Drs. Kaupke, Hundhausen, Krüger, Hamburg  
Grisanti, S. Prof. Dr. Universitätsklinik Schleswig-Holstein, Lübeck  
Asyo-Vogel, Mary Dr. Augen Praxisklinik Lübeck, Lübeck  
Timm, Angela Dr. Praxis Drs. Beyer, Schneider und Timm. Wismar  
Merkel, Thomas. Praxis Drs. Miertsch, Kübek und Föry, Eckernförde  
Treumer, H. Dr. Flensburg  
Esper, Guido. Pius Hospital Oldenburg, Oldenburg  
Lanzrath, Claudia Dr. Praxis Drs. Lanzrath und Schlese, Oldenburg  
Weber, Christian Dr. Praxis Drs. Gersema, Weber und Kloss, Varel  
Breuer, Markus Dr. Praxis Drs. Breuer und Knecht, Westerstede  
Norda, Ansgar Dr. Praxis Dr. Norda und Hoff, Papenburg  
Saldaev, Peter. Praxis Dr. Parketta und Saldaev, Papenburg  
Niederstraßer, Dirk Dr. Praxis Drs. Niederstraßer und Brauel, Cuxhaven  
Winter, Martin Dr. Bremen  
Nehus, Nataliya. Gröpelingen, Bremen  
Froese, Sabine Dr. Praxis Prof. Dr. H. Werry / Dr. S. Froese. Celle  
Steiner, A.und M. Dr. Praxis Dr. A. und M. Steiner. Dannenberg  
Luhr, Anke Dr. Ärztehaus an der Sophienklinik, Hannover  
Wichmann, Wolfgang Dr. Praxis Drs. Wichmann u. Tuscher, Hamburg  
Salzmann, Nadja. Hannover  
Pohlmeyer, Milita Dr. Praxis Drs. Witschel, Höing, Nikolic und Aser-Asaritis, Hannover  
Kaufmann, Daniel Dr. Hannover  
Nilson, Dominika. Kliniken d.Med.Hochschule Zentrum HNO  
u.Augenheilkunde, Hannover  
Wiechens, B. Prof. Klinikum Region Hannover, Hannover  
Herrmann, Ralph Dr. Praxis Drs. Littmann, Herrmann und Zake, Hildesheim  
Nickel, Frank-Christian Praxis Drs. Nickel, Bullerkotte und Glombik, Peine  
Gockeln, Roland Dr. Praxis Drs. Schipper, Kesper und Gockeln. Nienburg  
Jacob, Michael Dr. Augenzentrum Drs. Werry, Knoche und Jacob.  
Stadthagen  
Egger, Sören-Christian Dr. Praxis Drs. Egger und Hassinger. Detmold  
Kielhorn, Ingrid Dr. Paderborn

Reinking, Uwe Dr. Drs. Uwe u. Ruth Reinking. Salzkotten  
Eller-Woywood, Susanne Dr. Praxis Drs. Goldmann u. Eller-Woywood.  
Gütersloh  
Kube, Thomas Dr. Praxis Drs. Pache, Planert und Kube. Bielefeld  
Schmidt-Betschel, Wolfram Dr. Bad Wildungen  
Mennel, Stefan Prof. Universitätsklinikum Gießen u. Marburg GmbH, Marburg  
Lorenz, Birgit Prof. Dr. Universitätsklinik Gießen und Marburg GmbH, Gießen  
Serguhn, Stefan Dr. Lauterbach  
Gralle, Ingrid Dr. Northeim  
Kienzle, Stefan Dr. Praxis Drs. Kienzle, Lojewski u. Nolte, Herzberg am Harz  
Gittner, Christian Dr. Einbeck  
Hadjian, Hanna Dr. Praxis Drs. Hadjian. Stadtoldendorf  
Becker, Matthias Dr. Praxis Drs. Thale und Becker. Höxter  
Zander, Michael Dr. Städtisches Klinikum Braunschweig GmbH,  
Braunschweig  
Holak, Nikolai Dr. Praxis Drs. Holak. Salzgitter-Lebenstedt  
Motschmann, Markus Dr. Sana Ohre-Klinikum GmbH, Haldensleben  
Gregor, Paul Dr. Düsseldorf  
Stahn, Janet Dr. Praxis PD Dr. Thomas Laube. Düsseldorf  
Kölb-Keerl, Ruth Dr. Düsseldorf  
Lehmann, Reinhard Dr. Praxis Drs. Lehmann und Schneider.  
Mönchengladbach  
Janßen, Benno. Dormagen  
Holzweg, Detlef Dr. Viersen  
Schilling, Harald Prof. Dr. St. Johannes Hospital, Dortmund  
Ringwald, Andreas. Klinikum Dortmund gGmbH, Dortmund  
Seipolt, Christoph Dr. Essen  
Storms, Katja Dr. Praxis Dr. Storms u. Schad. Essen  
Tappe-Nierhaus, Lioba. Praxis Drs. Wollring, Ameye u. Tappe-Nierhaus,  
Essen  
Heger, Bruno W. Dr. Praxis Dr. Bruno W. Heger und Partner. Mühlheim  
Dohrmann, Jens Dr. Recklinghausen  
Anastassiou, Gerasimos PD Dr. Gelsenkirchen  
Schumacher, Manfred. Praxis Schumacher, Dr. Farghaly und Sonnenschein.  
Bottrop  
Thelen, Ulrich Dr. Münster  
Spital, Georg Dr. Gemeinschaftspraxis Prof. Dr. med. Daniel Pauleikhoff, Dr.  
med. Jörg Koch und Kollegen. Münster  
Uhlig, Constantin Dr. Universitätsklinik Münster, Münster  
Beeke, Erik Dr. Klinikum Osnabrück, Osnabrück  
Drodofsky, Carl M. Dr. Praxis Drs. Willmann, Riesmeier und Drodofsky.  
Osnabrück

Fell, Alexander Dr. Augenärztliche Gemeinschaftspraxis, Bad Rothenfelde  
Flöte, Matthias Dr. Dres. Flöte u. Bosche, Vechta  
Sander, Dirk Dr. Quakenbrück  
Lung, Ellen Dr. Köln  
Göddertz, Heinz-Günther. Praxis Dr. Wasserschaff u. Göddertz, Köln  
Schulze, Hans-Ulrich Dr. Praxis Drs. Heimbürg-Ellinger und Schulze. Köln  
Schendel, Roy Dr. Städtische Kliniken Köln-Merheim, Köln  
Schendel, Roy Dr. Städtische Kliniken Köln-Merheim, Köln  
Dobek, Klaus Dr. Leverkusen  
Radermacher, Martin Dr. Praxis Drs. Radermacher u. Schnell. Waldbröl  
Wieder, Katharina Dr. Praxis Drs. Sieben und Wieder. Aachen  
Walter, Peter Prof. Dr. Universitätsklinikum Aachen, Aachen  
Kleine-Meidick, Mischa Dr. Evangelische Kliniken Bonn GmbH, Bonn  
Finger, R. Dr. Universitätsklinikum Bonn, Bonn  
Dunker, Stephan Dr. Troisdorf-Sieglar  
Dr. Renate Putschögl / Dr. Christian Bahrke, Praxis Drs. Bahrke u. Putschögl.  
Trier  
Rauber, Martin Dr. Praxis Drs. Zuche und Rauber, Saarburg  
Marx-Groß, Susanne Dr. Universitäts-Augenklinik, Mainz  
Kramann, Christina Dr. Universitäts-Augenklinik, Mainz  
Hochgesand, Dirk Dr. Mainz  
Pieroth-Vinals, Lise Dr. Praxis Drs. Pieroth-Vinals u. Kollegen, Bad Kreuznach  
Sarafiant, Alexandru Dr. Kirn  
Klar, Wolfgang Dr. Praxis Drs. Klar und Spindler. Idar-Oberstein  
Papandreaou, Ilias Dr. Augenzentrum Koblenz, Koblenz  
Knebel, Christof Dr. Koblenz  
Fuchs, Hendrik Dr. Praxis Drs. Fuchs, Frank u.a. Siegen  
Bulawski, Arina Dr. Praxis Drs. Gansauer und Wehler. Altenkirchen  
Wiswe, Isabel Dr. Praxis Drs. Wiswe, Brandenburg, König, Hagen  
Engelhardt, Sascha Dr. Praxis Dr. Nader Berg, Herdecke  
Winkgen, Andrea Dr. Praxis Drs. Kaschube, Linares u. Winkgen, Lüdenscheid  
Kaskel-Paul, Susanne Dr. Klinikum Lüdenscheid, Lüdenscheid  
Valcarcel, Pedro Dr. Iserlohn  
Ruf, Johannes. Augenärztliche Gemeinschaftspraxis Ahlen, Ahlen  
Bader, Elisabeth Dr. Praxis Drs. Kramer und Bader. Arnsberg  
Krist, Romano Dr. Bürgerhospital, Frankfurt am Main  
Matterstock, Gunter Dr. Praxis Drs. Matterstock u. Zubcov-Iwantscheff.  
Frankfurt am Main  
Weiler, Winfried Dr. Offenbach/M.  
Emmerich, K.-H. Dr. Klinikum Darmstadt, Darmstadt

Frisch, Lars Dr. Praxis Drs. Haberdank und Frisch. Wiesbaden  
Schmitt, Ralf Dr. Saarbrücken  
Strauß, Markus Dr. Saarbrücken  
Ladewig, M.S. OA Dr. Klinikum Saarbrücken, Saarbrücken  
Gebhardt, Kerstin Dr. Quierschied  
Seitz, Berthold Prof. Universitätsklinikum des Saarlandes, Homburg/Saar  
Hattenbach, L.-O. Dr. Klinikum der Stadt Ludwigshafen, Ludwigshafen am Rhein  
Gossmann, Viktor. Ludwigshafen  
Reichert, Heinz Dr. Frankenthal  
Dillinger, Patrick Dr. Praxis Drs. Grewing und Dillinger. Kaiserslautern  
Bültmann, Stefan Dr. Ladenburg  
Rabethge, Steffen Dr. Schriesheim  
Benke, Armand Dr. Weinheim  
Ditzen, Klaus Dr. Weinheim  
Lindemann, Gabriele Dr. Weinheim  
Kaiser, Adam Dr. Stuttgart  
Petrys-Kulisiewicz, P. Dr. Stuttgart (Feuerbach)  
Banyai, Liliana Dr. Leonberg  
Völker, Michael Dr. Universitätsklinikum Tübingen, Tübingen  
Krzizok, Thomas Prof. Dr. Esslingen  
Rösler, Katharina Dr. Praxis Drs. Schäferhoff und Rösler. Esslingen  
Amiri, Roya Dr. Esslingen am Neckar  
Hornef, S. Dr. Praxis Drs. Hornef u. Bühler. Schwäbisch Hall  
Werth, Dieter Dr. Bad Liebenzell  
Medicke, Irene. Karlsruhe  
Schumacher, Annegret Dr. Praxis Drs. Berens, Schumacher u. Saschin. Karlsruhe  
Weinhold, Kamil Dr. Karlsruhe  
Wehrle, Birgit Dr. Dres. Wehrle u. Hofmann. Landau  
Eckert, Jens Dr. Villingen-Schwenningen  
Kono Kono, Jean O. Dr. Praxis Drs. Beer u. Kono Kono. Konstanz  
Okrafka, Klaus Peter. Konstanz  
Spang, Stephan Dr. Praxis Drs. Adelong, Spang, Pleyer und Haka. Tuttlingen  
Grüb, Matthias Dr. Braisach  
Entenmann, B. Dr. Praxis Drs. Korff u. Entenmann. Waldshut  
Carl, Thomas Dr. Praxis Prof. J. Nasemann und Dr. Th. Carl, München  
Stützle, Cornelia Dr. Medizinisches Versorgungszentrum. München  
Merter, Nilüfer. Medizinisches Versorgungszentrum. München  
Rehfeld, Antje Dr. Praxis Dr. Drechsel u. Rehfeld. München

Drechsel, Erhard Dr. München  
Ferrer-Woehlcke, Isabel. München  
Hirneiß, Christoph Dr. München  
Waltrich, Heidrun Dr. Dres. Waltrich, Neuhann u.a. München  
Wolf, Waltraud Dr. München  
Haindl-Maierhofer, Ellen Dr. München  
Körner, Sabine Dr. München  
Dimitriou, Socrates Dr. München  
Raab-Cumpelik, Suzanna Dr. München  
Witta, Birke Dr. in Praxis Dres. Rothenfußler u. Heidenkummer. München  
Feucht, Nikolaus Dr. Klinikum Rechts der Isaar, München  
Maier, Matthias Dr. Klinikum Rechts der Isaar, München  
Wertheimer, Richard Dr. Praxis Drs. Wertheimer u. Wittmer. München  
Keller, Othmar Dr. Herrsching  
Coen, Thomas Dr. Praxis Dr. Andreas Kurz. Fürstenfeldbruck  
Hamacher, Thomas Dr.med. Augenzentrum Dr. Hamacher Klinik GmbH,  
Starnberg  
Schmidt, K.-G. Dr. Augenklinik Starnberg, Starnberg  
Hoch, Christian. Weilheim  
Zenk, Ulrich Dr. Praxis Drs. Pfäffe, Zenk und Kollegen. Weilheim  
Seidova, Seid-Fatima. Praxis Dres. Lange u. Lanzl, Prien  
Schaal, Tomas Dr. Praxis Dr. Schaal und PD Dr. Dinslage, Bad Tölz  
Ugi, Ian Dr. Augen-MVZ Landshut, Landshut  
Ugi (2. BV), Ian Dr. Augen-MVZ Landshut, Landshut  
Ugi, Ian Dr. MVZ Landshut, Landshut  
Bengisu, Mete Dr. Mühldorf  
Juranek, Radomir Dr. Mühldorf/Inn  
Steinmetz, B. Dr. Praxis Drs. Clemente-Rösch und Gabriel. Mühldorf  
Papadopoulos, Kosmas Dr. Burgkirchen  
Grasbon, Thomas Dr. Ingolstadt  
Sendtner, Peter Dr. Augenzentrum Eichstätt, Eichstätt  
Erhard, Daniela Dr. Augenärzte am Airport, München Airport  
Zöhrer, Richard Dr. Praxis Dr. Peter Buschmann. Garching  
Rombold, Felix Dr. Zentralklinikum Augsburg, Augsburg  
Niederdelmann, Christoph Dr. Friedberg  
Jung, Anita Dr. Gemeinschaftspraxis Dres. Jung u. Kibittel, Gersthofen  
Hutter, Hubert Dr. Praxis Drs. Hutter und Jegielka. Schrobenhausen  
Krell, Wolfgang Dr. Schwabmünchen  
Luda, Stephan Dr. Praxis Drs. Luda. Kempten  
Schimitzek, Günther Dr. Kempten



|                 |                                                                                                                                                                                                                                                                                                                                                                                                                                                                                                                                                                                                                                                                                                                                                                                                                                                                                                                                                                                                                                                                                                                                                                                                                                                                                                                                                                                                                                                                                                                                                                                                                                                                                                                                                                                                                                                                                                                     |
|-----------------|---------------------------------------------------------------------------------------------------------------------------------------------------------------------------------------------------------------------------------------------------------------------------------------------------------------------------------------------------------------------------------------------------------------------------------------------------------------------------------------------------------------------------------------------------------------------------------------------------------------------------------------------------------------------------------------------------------------------------------------------------------------------------------------------------------------------------------------------------------------------------------------------------------------------------------------------------------------------------------------------------------------------------------------------------------------------------------------------------------------------------------------------------------------------------------------------------------------------------------------------------------------------------------------------------------------------------------------------------------------------------------------------------------------------------------------------------------------------------------------------------------------------------------------------------------------------------------------------------------------------------------------------------------------------------------------------------------------------------------------------------------------------------------------------------------------------------------------------------------------------------------------------------------------------|
|                 | <p>Brändle, Jürg Dr. Füssen</p> <p>Ertl, Johann Dr. Füssen</p> <p>Heimann, Philipp Dr. Überlingen</p> <p>Nietgen, Gregor Dr. Praxis Drs. Nietgen, Schütte &amp; Roth. Ulm</p> <p>Seybold, Yvonne Dr. Praxis Drs. Seybold u. Kollegen. Dillingen</p> <p>Schön, Joachim Dr. Heidenheim</p> <p>Bernhard, Adrian. Maximilian MVZ, Nürnberg</p> <p>Küchle, Michael Prof. Praxis Drs. Küchle, Haas u. Götz, Erlangen</p> <p>Lefter, Carolina Dr. Praxis Drs. Schock, Faßbender, Costea, Aurig und Wunderle, Erlangen</p> <p>Meiller, Ralph Dr. Universitätsklinikum Erlangen, Erlangen</p> <p>Wolter-Roessler, Eva Dr. Praxis Drs. Eva und Michael Wolter-Roessler. Lauf an der Pegnitz</p> <p>Jaksche, Axel Dr. Praxis Drs. Jaksche, von Busse, Achatz, Braunschweig-Keller, Ansbach</p> <p>Fehn, Axel. Praxis Prof. Dr. Dausch und Fehn. Amberg</p> <p>Faßbender, Daniel Dr. Medizinisches Versorgungszentrum, Neumarkt</p> <p>Gamulescu, Andreea Dr. Universitätsklinikum Regensburg, Regensburg</p> <p>Rau, Magda Dr. Furth im Wald</p> <p>Demmler-Hackenberg, Martina Dr. Praxis Drs. Tacke und Demmler-Hackenberg. Passau</p> <p>Brandl, Thomas Dr. Praxis Drs. Münich und Brandl. Straubing</p> <p>Thierfelder, Soeren Dr. Helmbrechts</p> <p>Krehn, Edith Dr. Augenzentrum Bayreuth, Bayreuth</p> <p>Schmucker, Achmed Dr. Hirschaid</p> <p>Wenkel, Hartmut PD Dr. Praxis Drs. Wenkel, Scherf und Krist. Coburg</p> <p>Schargus, Marc Dr. Kopfklinikum Würzburg, Würzburg</p> <p>Domack, Harry Dr. Praxis Drs. Domack, Best und Schmidt. Schweinfurt</p> <p>Schilling, Christiane Dr. SRH Zentralklinikum Suhl gGmbH, Suhl</p> <p>Graf, Evelyn Dr. Schmalkalden</p> <p>Schmidt, Jürgen Dr. Praxis Drs. Schmidt, Salfelder, Gräf. Erfurt</p> <p>Walther, Hans-Rainer PD Dr. Weimar</p> <p>Voita, Robert Dr. Nordhausen</p> <p>Rudolphi, Thomas Dr. Radolfzell am Bodensee</p> <p>Fröhlich, Thomas Dr. Freiburg</p> |
| The Netherlands | <p>J.H.J. Klaver. OMC Haarlem, Haarlem</p> <p>C.B. Hoyng. Radboud University Nijmegen Medical Centre, Nijmegen</p> <p>A.J. Raijmakers. Rijnland Ziekenhuis, Leiderdorp</p> <p>J.Lith-Verhoeven. Sint Elisabeth Ziekenhuis, Tilburg</p> <p>A.H.F. Rulo. Oogziekenhuis Zonnestraal, Hilversum</p> <p>C.F. Hommersom. Maxima Medisch Centrum, Veldhoven</p>                                                                                                                                                                                                                                                                                                                                                                                                                                                                                                                                                                                                                                                                                                                                                                                                                                                                                                                                                                                                                                                                                                                                                                                                                                                                                                                                                                                                                                                                                                                                                            |

|        |                                                                                                                                                                                                                                                                                                                                                                                           |
|--------|-------------------------------------------------------------------------------------------------------------------------------------------------------------------------------------------------------------------------------------------------------------------------------------------------------------------------------------------------------------------------------------------|
|        | <p>Y. de Jong-Hesse. VU Medical Center Amsterdam</p> <p>E.H. Bosch-Driessen. Flevoziekenhuis, Almere</p> <p>M.H.Smeets. Jeroen Bosch Ziekenhuis, s'-Hertogenbosch</p> <p>A. Gonçalves. St. Jans Gasthuis, Weert</p> <p>H.J. Klomp. Ziekenhuis Nij Smellinghe, Drachten</p> <p>V.P.T. Hoppenreijs. Deventer Ziekenhuis, Deventer</p> <p>J.J. Dito. OPSIS Oogartsenpraktijk, Amstelveen</p> |
| Sweden | <p>L. Hjelmqvist. St. Erik's Eye Hospital, Karolinska Institutet, Stockholm</p> <p>C. Lindberg. Lund University Hospital, Lund</p> <p>C. Lindberg. Helsingborg Hospital, Helsingborg</p> <p>P. Kanulf. Ryhov Hospital, Jönköping</p> <p>H. Dahlgren. Söderjukhuset, Stockholm</p> <p>I. Johansson. Örebro University Hospital, Örebro</p>                                                 |

**Supplementary Table 2.** Categories of events of particular interest MedDRA preferred

terms for events that occurred in the registries

| <b>OCULAR EVENTS</b>                                                                                                                                                      |                                        |                                                                                                            |                                                                                                                                |                                                                      |
|---------------------------------------------------------------------------------------------------------------------------------------------------------------------------|----------------------------------------|------------------------------------------------------------------------------------------------------------|--------------------------------------------------------------------------------------------------------------------------------|----------------------------------------------------------------------|
| <b>Deterioration of retinal blood flow</b>                                                                                                                                |                                        | <b>Endophthalmitis</b>                                                                                     | <b>Intraocular Pressure related events</b>                                                                                     | <b>Intraocular inflammation</b>                                      |
| Optic ischaemic neuropathy<br>Retinal aneurysm<br>Retinal artery occlusion<br>Retinal vascular disorder<br>Retinal vascular occlusion<br>Retinal vein occlusion           |                                        | Endophthalmitis<br>Eye infection<br>Uveitis                                                                | Fundoscopy abnormal<br>Intraocular pressure increased<br>Normal tension glaucoma<br>Ocular hypertension<br>Open angle glaucoma | Ocular hyperaemia<br>Retinal oedema                                  |
| <b>Retinal detachment</b>                                                                                                                                                 | <b>Retinal pigment epithelial tear</b> | <b>Retinal tear</b>                                                                                        | <b>Traumatic cataract</b>                                                                                                      | <b>Vitreous haemorrhage</b>                                          |
| Retinal detachment                                                                                                                                                        | Retinal pigment epithelial tear        | Retinal tear                                                                                               | Cataract                                                                                                                       | Vitreous haemorrhage                                                 |
| <b>NON-OCULAR EVENTS</b>                                                                                                                                                  |                                        |                                                                                                            |                                                                                                                                |                                                                      |
| <b>Hypersensitivity</b>                                                                                                                                                   |                                        | <b>Hypertension</b>                                                                                        |                                                                                                                                | <b>Myocardial infarction</b>                                         |
| Circulatory collapse<br>Eye pruritus<br>Eye swelling<br>Hypersensitivity<br>Pruritus                                                                                      |                                        | Blood pressure fluctuation<br>Blood pressure increased<br>Hypertension<br>Hypertension crisis              |                                                                                                                                | Myocardial infarction                                                |
| <b>Non-myocardial arterial thromboembolic events</b>                                                                                                                      |                                        | <b>Non-ocular Haemorrhage</b>                                                                              |                                                                                                                                | <b>Venous thromboembolic events</b>                                  |
| Amaurosis<br>Carotid artery stenosis<br>Cerebral haemorrhage<br>Cerebral infarction<br>Cerebrovascular accident<br>Haemorrhage intracranial<br>Transient ischaemic attack |                                        | Cerebral Haemorrhage<br>Duodenal ulcer haemorrhage<br>Epistaxis<br>Haemorrhage<br>Haemorrhage intracranial |                                                                                                                                | Deep vein thrombosis<br>Pulmonary embolism<br>Venous thrombosis limb |

**Supplementary Table 3.** Treatment exposure and 1 year incidence of adverse events of particular interest (% of patients in LUMINOUS program and other PRN study arms)\*

| Preferred terms<br>(MedDRA<br>dictionary), % | LUMINOUS<br>pooled<br>registries<br>(N=4,444) | CATT <sup>1</sup><br>(N=298) | SUSTAIN <sup>2</sup><br>treatment-<br>naïve**<br>(N=513) | SAILOR (0.5 mg) <sup>3</sup> |                       | HARBOR <sup>4</sup><br>(0.5 mg)<br>(N=275) | MONT<br>BLANC <sup>5</sup><br>(N=133) |
|----------------------------------------------|-----------------------------------------------|------------------------------|----------------------------------------------------------|------------------------------|-----------------------|--------------------------------------------|---------------------------------------|
|                                              |                                               |                              |                                                          | Cohort 1<br>(N=1,209)        | Cohort 2<br>(N=1,922) |                                            |                                       |
| Endophthalmitis                              | 0.1                                           | 0                            | 0                                                        | 0.4                          | 0.1                   | 0                                          | 0                                     |
| Intraocular<br>pressure<br>increased         | 0.3                                           | 0                            | 7.0                                                      | NR                           | NR                    | 1.8                                        | 5.3                                   |
| Stroke                                       | 0.4                                           | 0.3                          | 0.2                                                      | 1.2                          | 0.6                   | 0.4                                        | 3.0                                   |
| Hypertension                                 | 0.2                                           | 0                            | 2.9                                                      | 10.3                         | 3.0                   | 0.4                                        | 4.5                                   |
| Mean injection<br>no.                        | 4.3-5.5                                       | 6.9                          | 5.6                                                      | 4.6                          | 3.6                   | 7.7                                        | 5.1                                   |

\*Multiple events for the same adverse event were counted only once; results refer to the ranibizumab 0.5 mg PRN arm; \*\*87.9% injections with 0.3 mg, ocular events for study eye only

NR, not reported

<sup>1</sup>Martin DF, et al. N Engl J Med 2011;364:1897-08. <sup>2</sup>Holz FG, et al. Ophthalmol 2011;118:663-71. <sup>3</sup>Boyer DS, et al. Ophthalmol 2009;116:1731-9. <sup>4</sup>Suner I. Presentation at WOC, Feb 2012. <sup>5</sup>Larsen M, et al. Ophthalmol 2012;119:992-1000.
